# Supplementary material
Source: HighWire-hosted journal article supplement (https://emboj.embopress.org/content/35/15/1677/F3)

Source data Figure 2

2F)

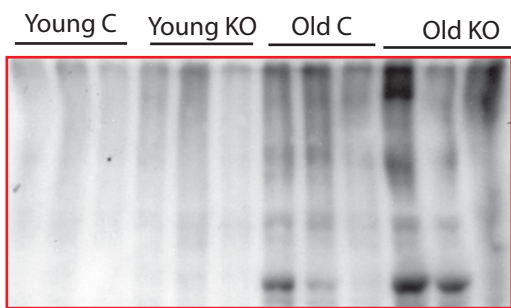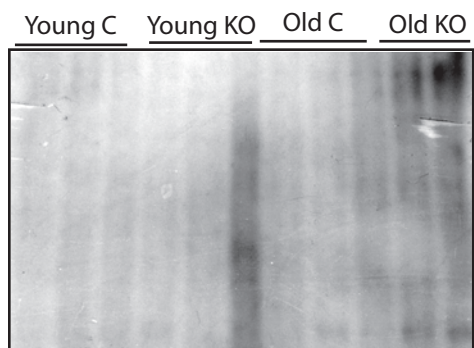

Supplement: inline-supplementary-material-2 [file inline-supplementary-material-2.pdf]
